# Supplementary material for: Does white matter structure or hippocampal volume mediate associations between cortisol and cognitive ageing?
Source: PubMed Central journal article supplement (PMC4642652; doi:10.1016/j.psyneuen.2015.08.005), 2015-12

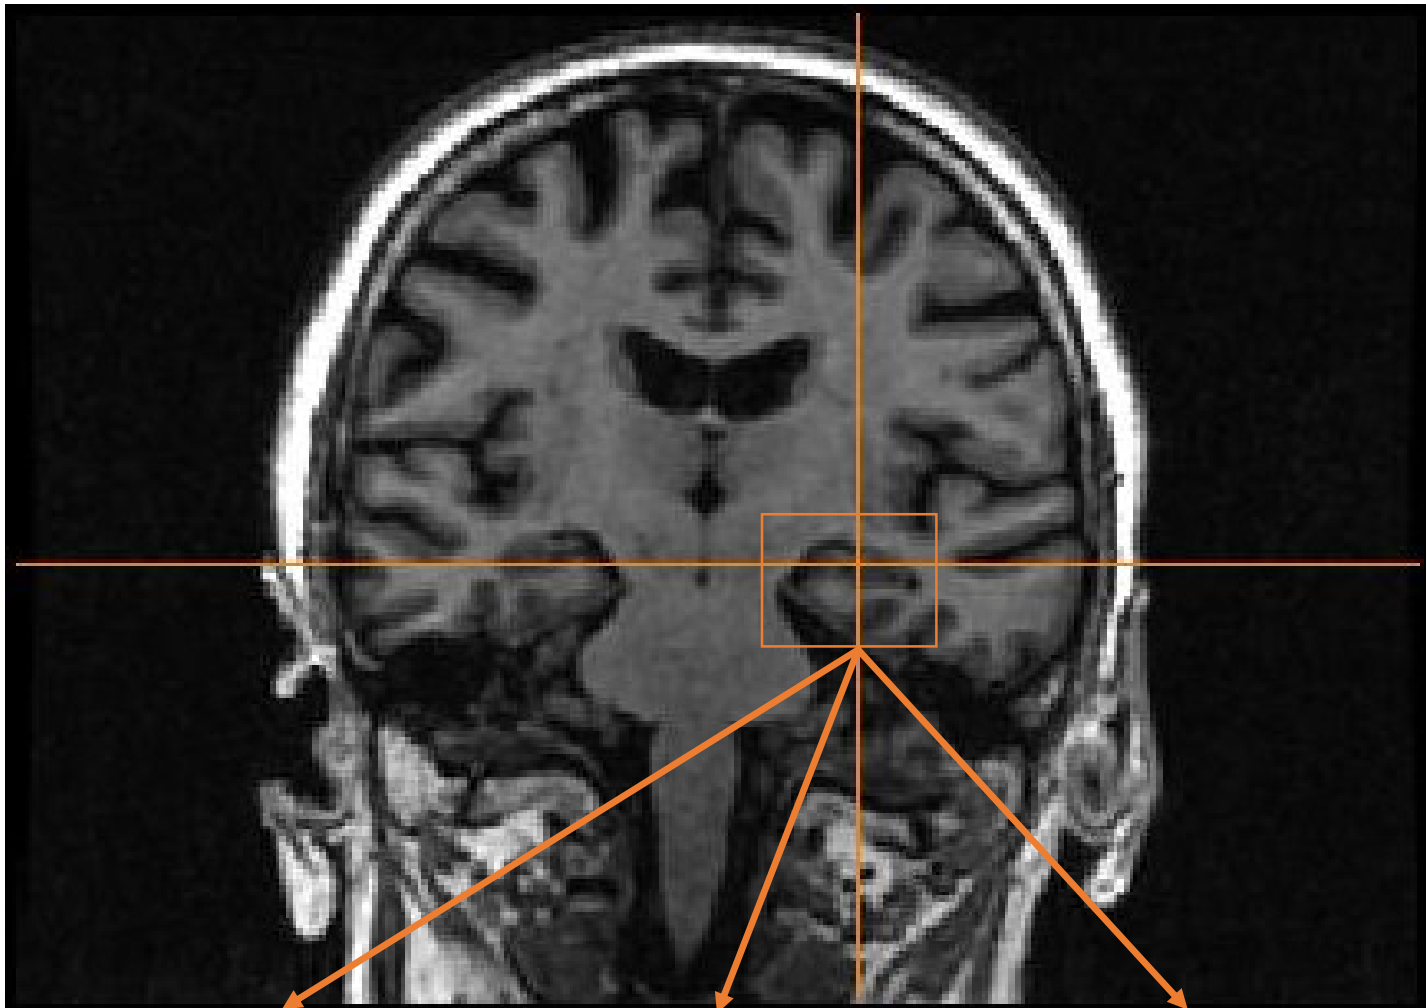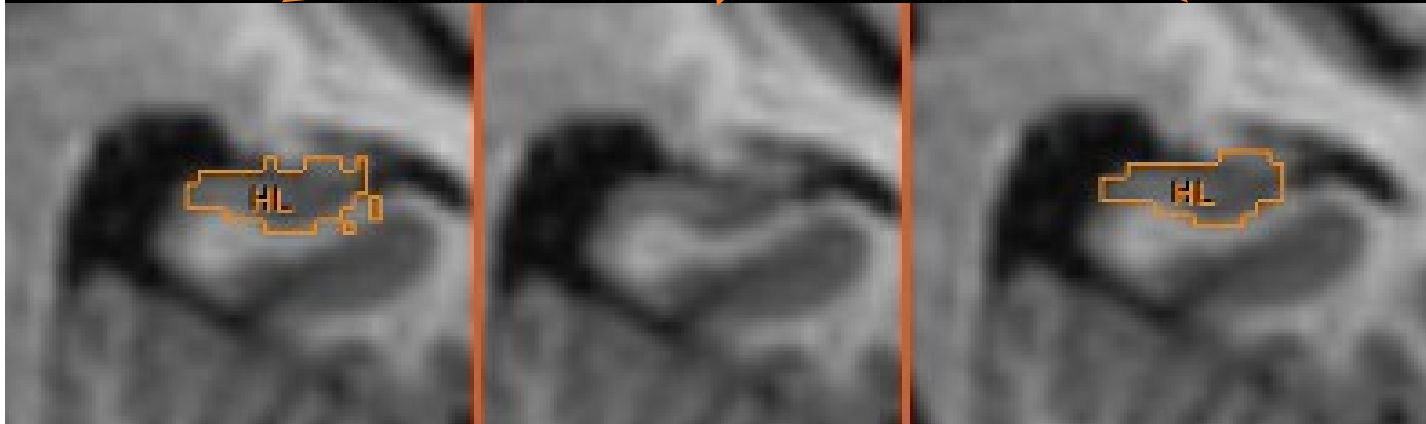

Supplement: mmc1.pdf [file mmc1.pdf]
